# Supplementary material
Source: publisher figshare collection journal article supplement (https://tandf.figshare.com/ndownloader/files/22670450)

**Supplemental Figure 1.** Structure of hypomethylating agents.


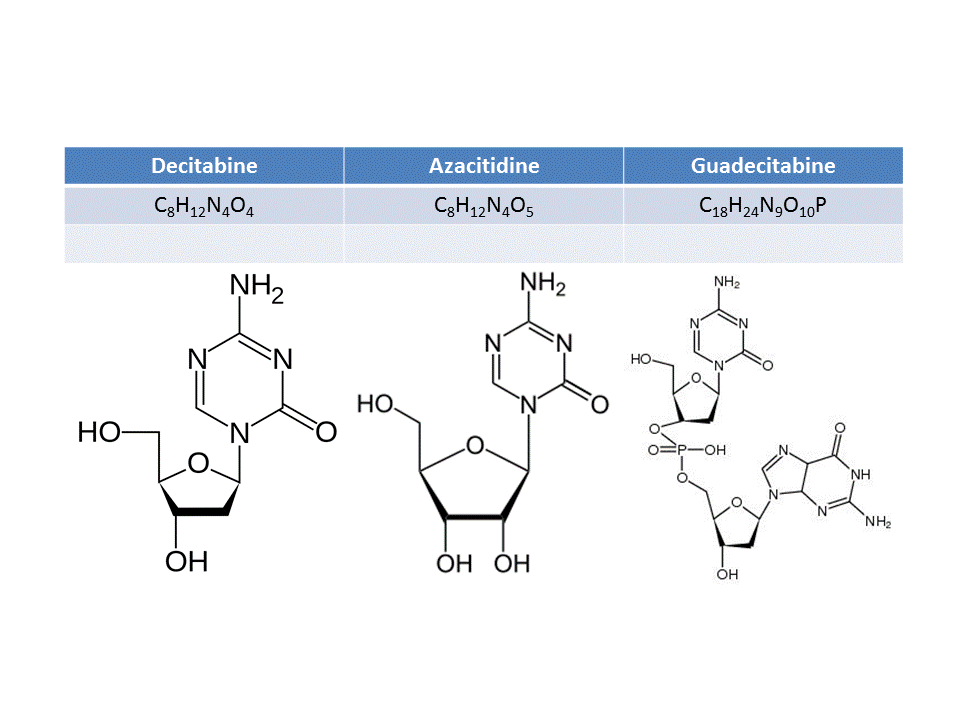


**Supplemental Figure 2.** Structure of HDAC inhibitor pracinostat.


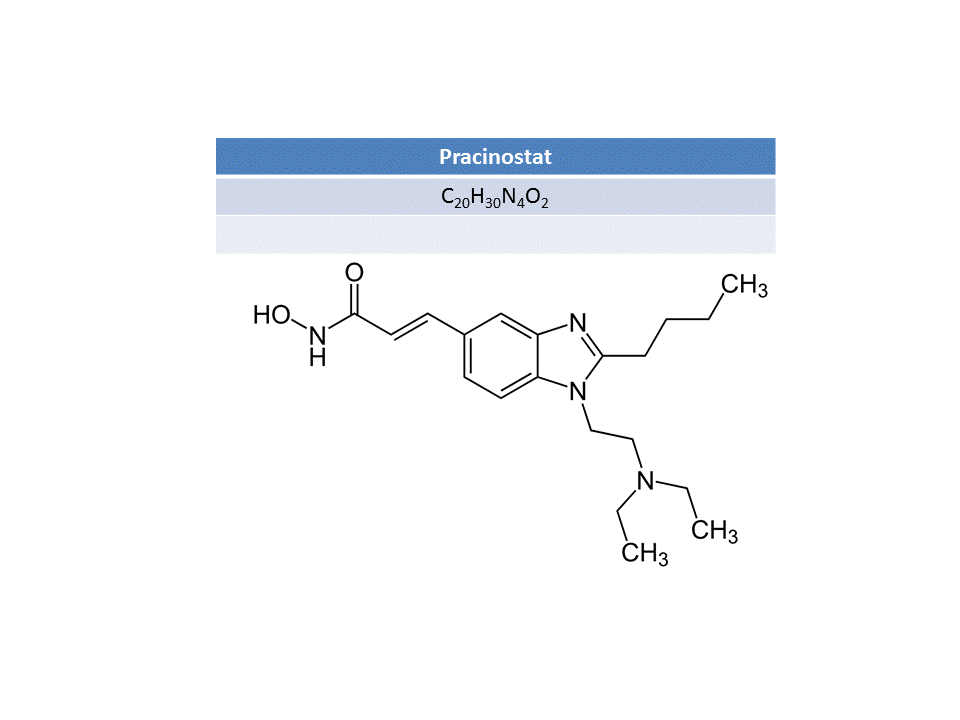


**Supplemental Figure 3.** Structure of IDH inhibitors.

**
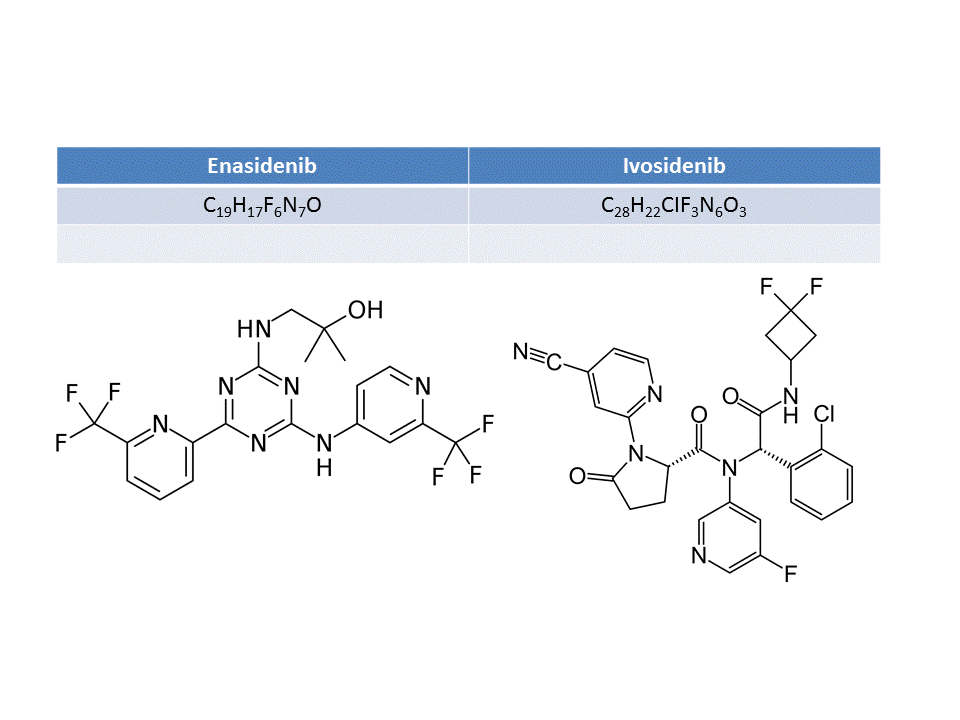
**

**Supplemental Figure 4.** Structure of first-generation FLT3 inhibitors.

**
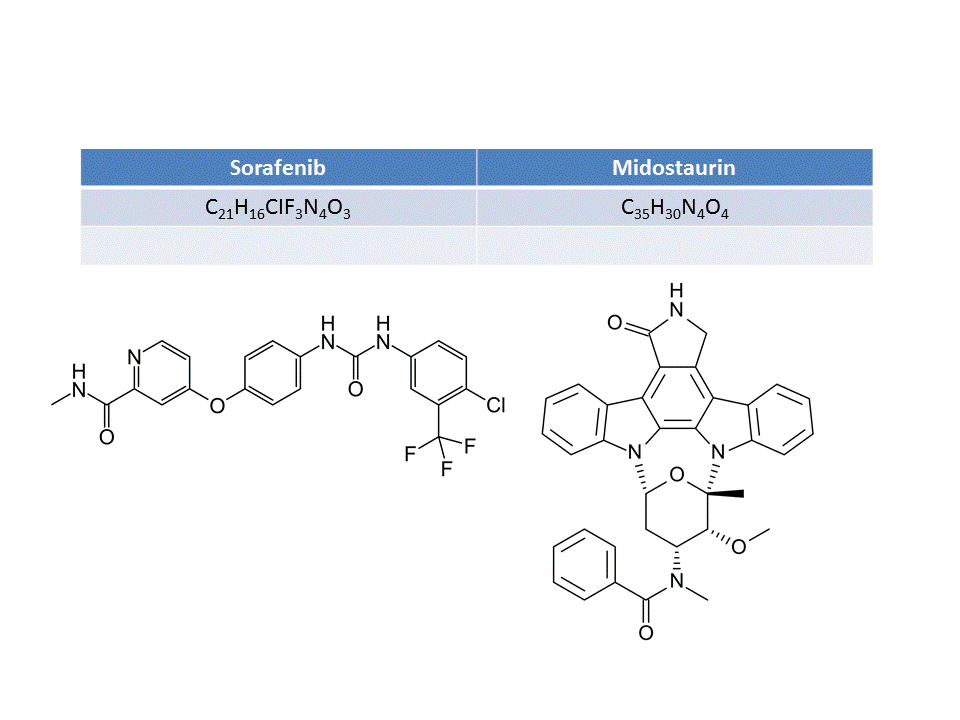
**

**Supplemental Figure 5.** Structure of second- and third-generation FLT3 inhibitors.

**
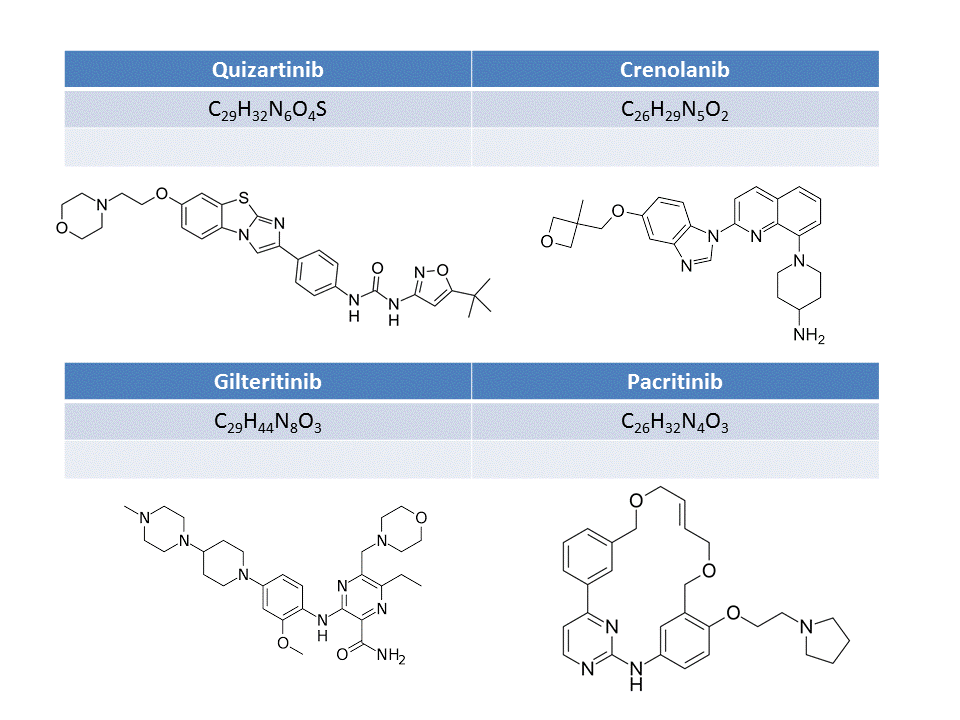
**

**Supplemental Figure 6.** Structure of Venetoclax.

**
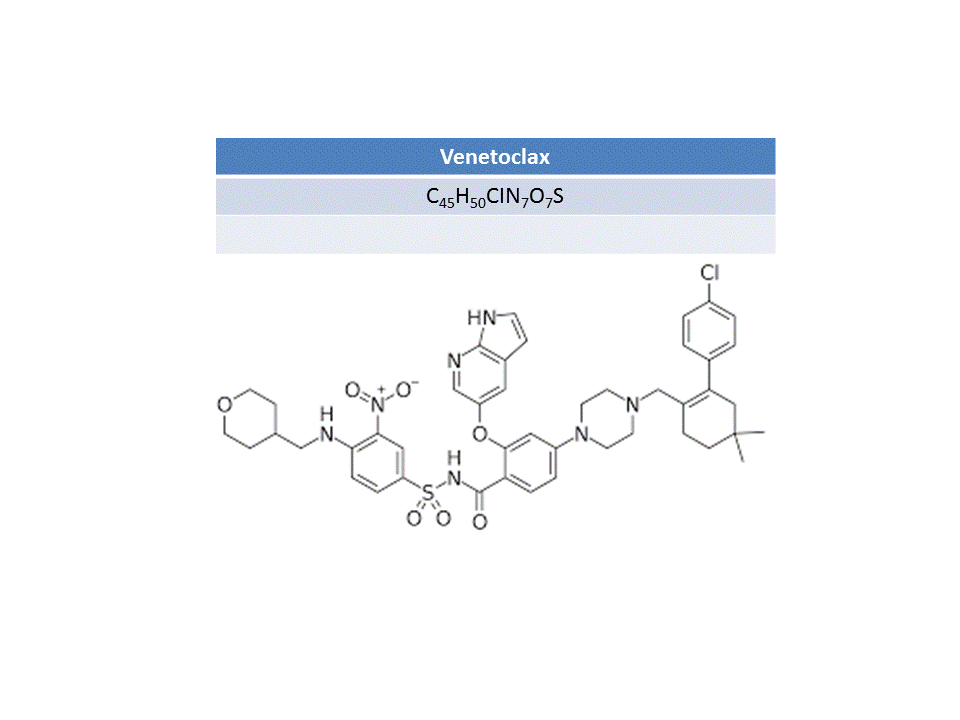
**

**Supplemental Figure 7.** Structure of Glasdegib.


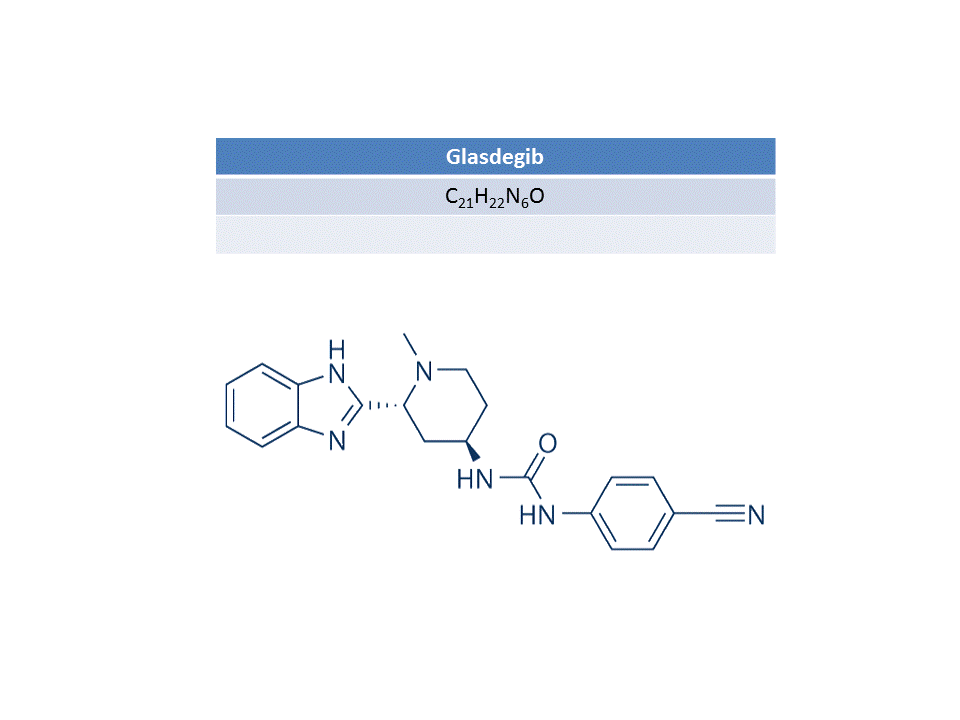


**Supplemental Figure 8.** Structure of MDM2 antagonist, idasanutlin.


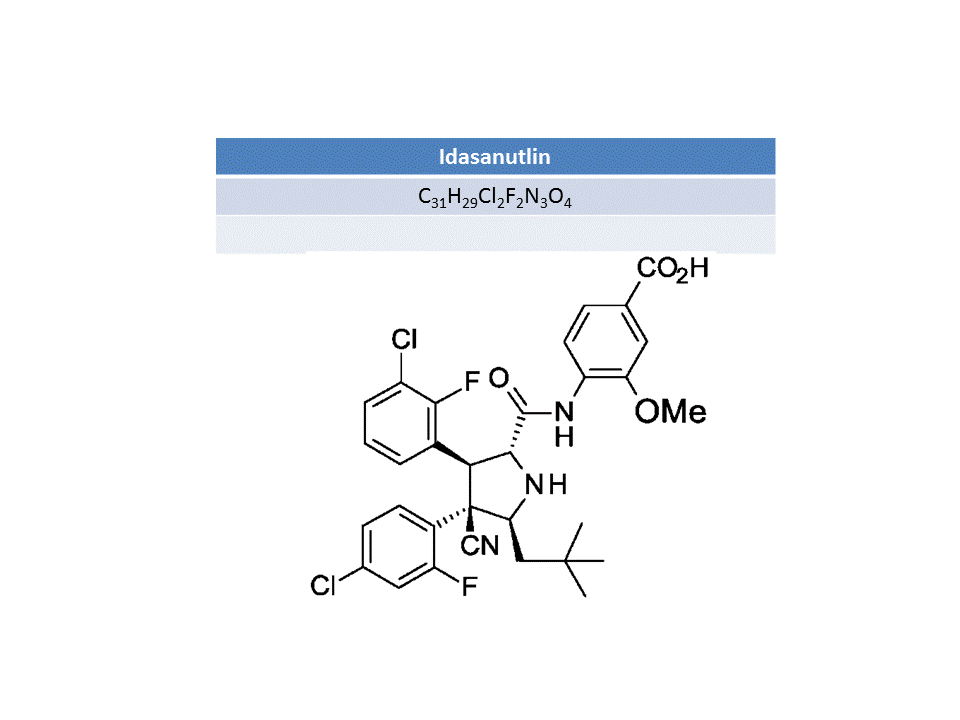

Supplement: Supplementary file 1 [file 22670450]
